# Supplementary material
Source: PubMed Central journal article supplement (PMC6824486)
Supplement: supp_P119000335_155151_1_supp_392120_pxkstl.pdf [file supp_P119000335_155151_1_supp_392120_pxkstl.pdf]

**Supplemental Table S1:** Screening primers for *LPL* CNVs.

| CNV             | Breakpoint | Primer direction | Primer sequence (5' to 3')     | Annealing temp (°C) | Primer labels in Figure 1 and 2 |
|-----------------|------------|------------------|--------------------------------|---------------------|---------------------------------|
| 5'UTR – exon 1  | Upstream   | F                | TTGTAGGTTAGAGTGAACGTGCACAG     | 60                  | P2                              |
|                 |            | R                | CATTATGCTGATGCTGCACAACCTCTG    | 60                  | P3                              |
|                 | Downstream | F                | TTCACACTTGATGGTCTCATTCAAGTGG   | 60                  | P4                              |
|                 |            | R                | GATCAGACTGAATTGATTGGTCTGTTTCAG | 60                  | P5                              |
| 5' UTR – exon 2 | Upstream   | F                | CTCTATTGGACGTGCTAATGGCACAG     | 60                  | P1                              |
|                 |            | R                | CATTATGCTGATGCTGCACAACCTCTG    | 60                  | P3                              |
|                 | Downstream | F                | ACTGACATGCTGACATGCCAGATG       | 60                  | P6                              |
|                 |            | R                | CATCTGTGTGAATTCTGTTAGTAGTAG    | 60                  | P7                              |

The primers listed were designed to flank the two breakpoints for each CNV. The “Breakpoint” listed is relative to the deleted section of the gene. The sequence orientation for P1-P7 are relative to *LPL*. Highlighted primer sequences are the same. Abbreviations: CNV = copy-number variant; F = forward; R = reverse; UTR = untranslated region.

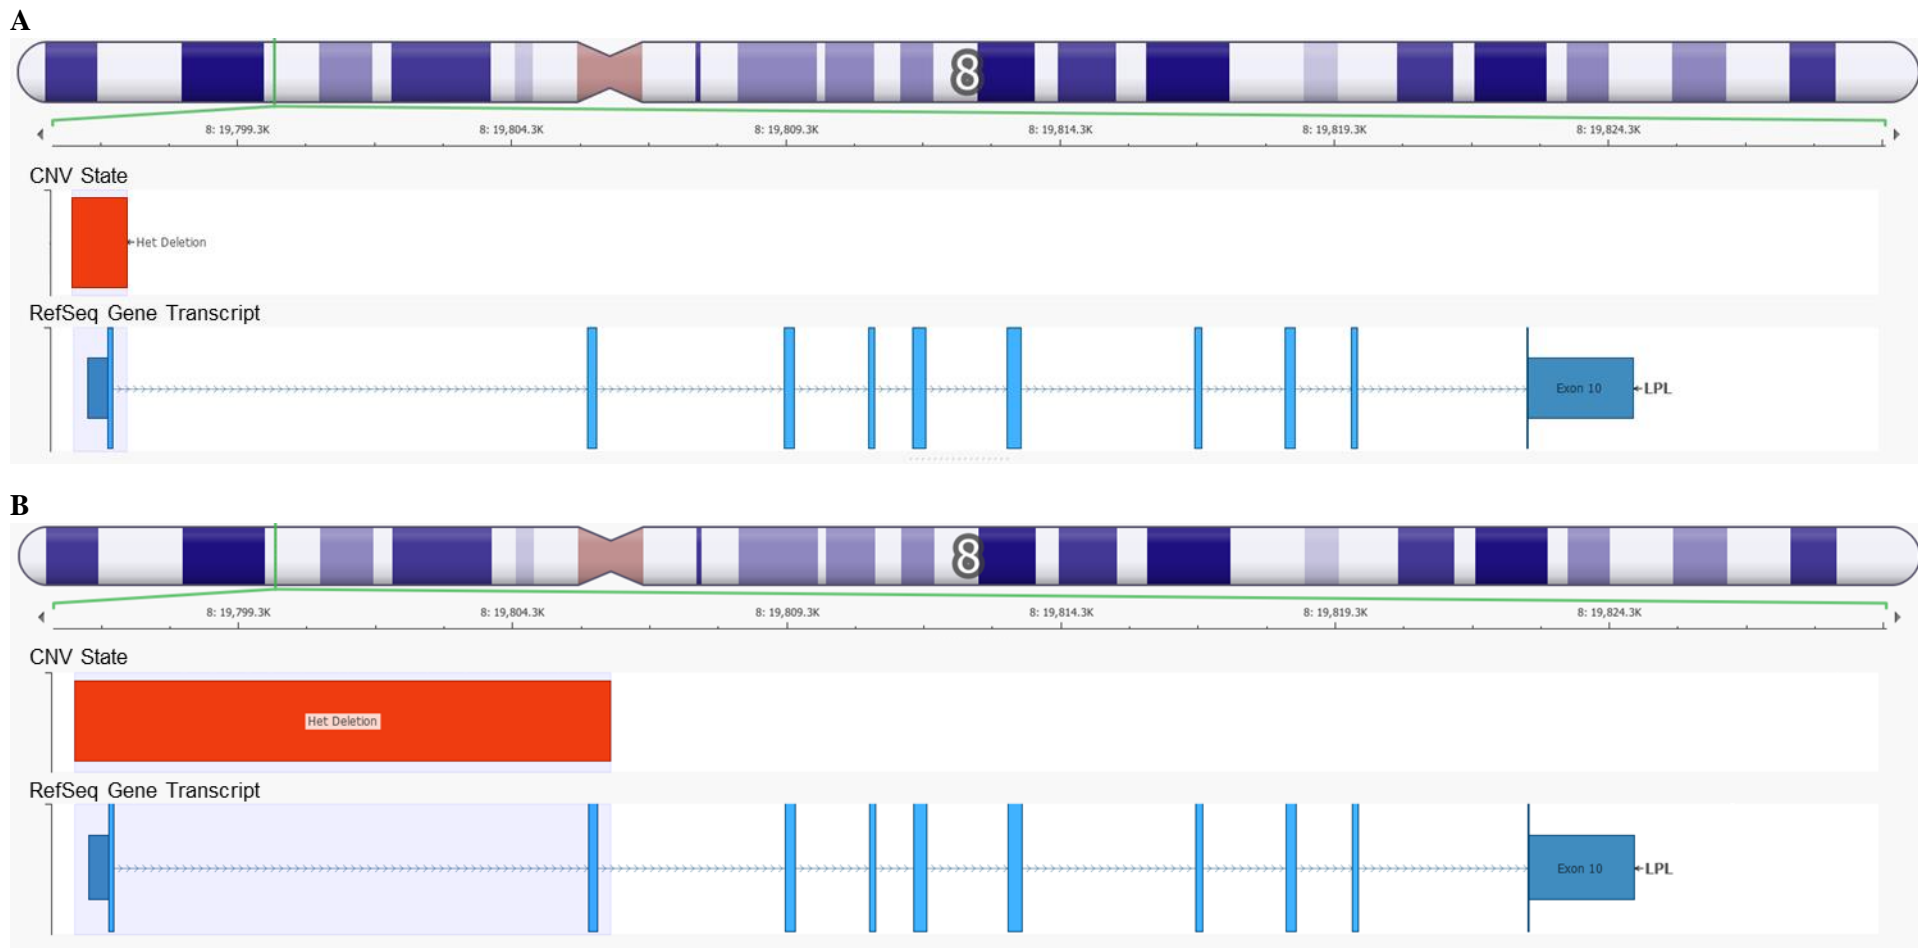

**Supplemental Figure S1. Identification of *LPL* CNVs using the VarSeq-CNV® caller algorithm on targeted sequencing data.** Chr8:19,795,931-19,829,369 (hg19 genome build) is the region visualized in each panel. **A)** Subject 1, carrier of a heterozygous deletion spanning the 5'UTR and exon 1 of *LPL*. **B)** Subject 2 to 4, carriers of a heterozygous deletion spanning the 5'UTR, exon 1 and exon 2 of *LPL*. Abbreviations: chr = chromosome; CNV = copy-number variant; UTR = untranslated region.
